# Supplementary material
Source: Springer Nature journal article supplement (https://www.springermedizin.de/resource/supplementary/12985_2010_963_MOESM4_ESM.pdf/9608836)

A

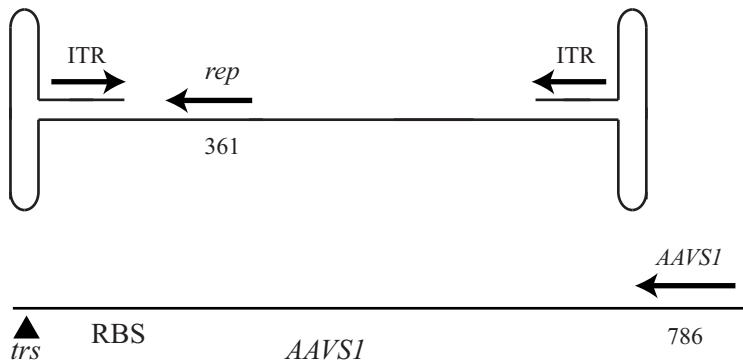

B

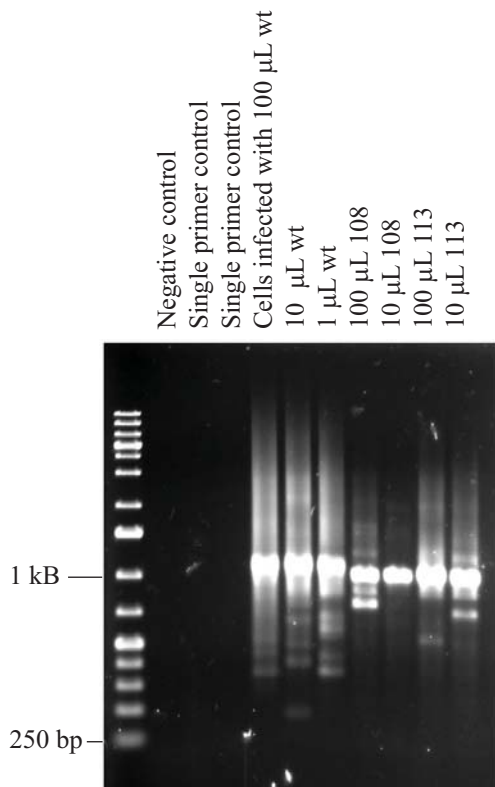

C

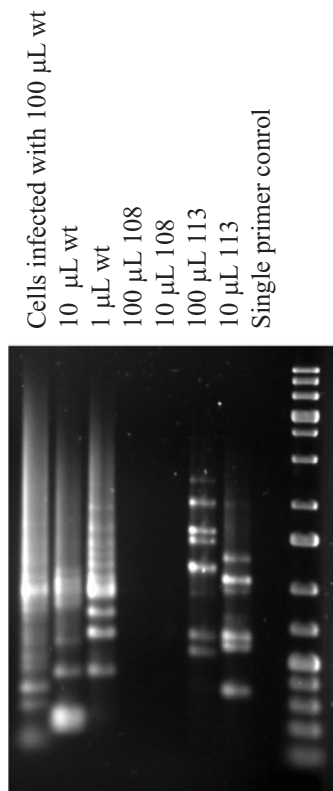

Supplement: MOESM4 [file 9608836]
